# Supplementary material for: MoS2 nanotubes loaded with TiO2 nanoparticles for enhanced electrocatalytic hydrogen evolution
Source: Royal Society of Chemistry journal article supplement (doi:10.1039/c9ra05041h), 2019-01-01
Supplement: c9ra05041h1.pdf [file c9ra05041h1.pdf]

## Electronic Supplementary Information

### MoS<sub>2</sub> nanotubes loaded with TiO<sub>2</sub> nanoparticles for enhanced electrocatalytic hydrogen evolution

Bo Feng,<sup>a</sup> Chuntao Liu,<sup>\*ab</sup> Weiyi Yan,<sup>a</sup> Jianxin Geng<sup>a</sup> and Guimin Wang<sup>a</sup>

<sup>a</sup> School of Chemistry and Materials Science, Heilongjiang University, Harbin 150080, China

<sup>b</sup> Key Laboratory of Chemical Engineering Process & Technology for High-efficiency Conversion, School of Chemistry and Materials Science, Heilongjiang University, Harbin 150080, China

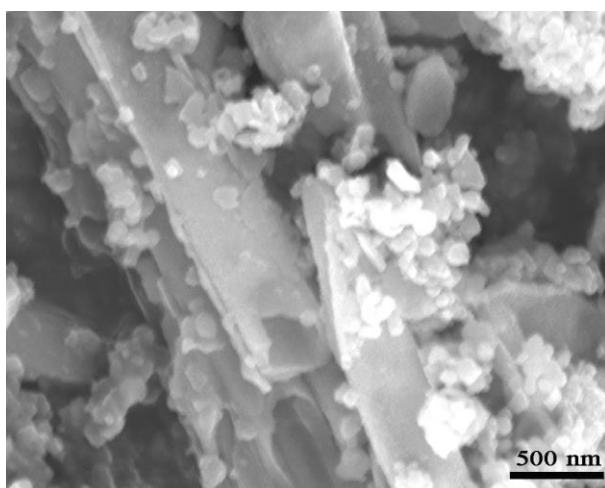

**Figure S1.** SEM image of TiO<sub>2</sub>/MoS<sub>2</sub>-NTs

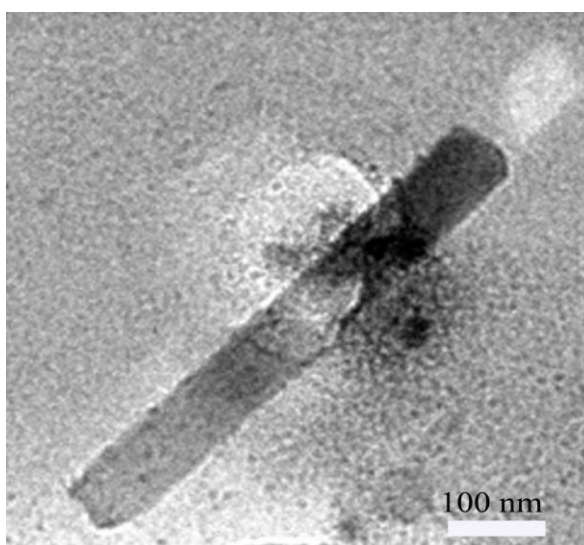

**Figure S2.** TEM image of naked MoS<sub>2</sub>-NTs

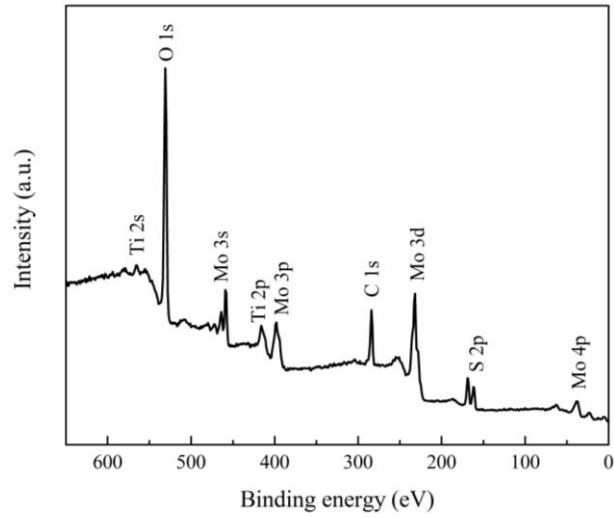

**Figure S3.** XPS survey spectrum of  $\text{TiO}_2/\text{MoS}_2\text{-NTs}$

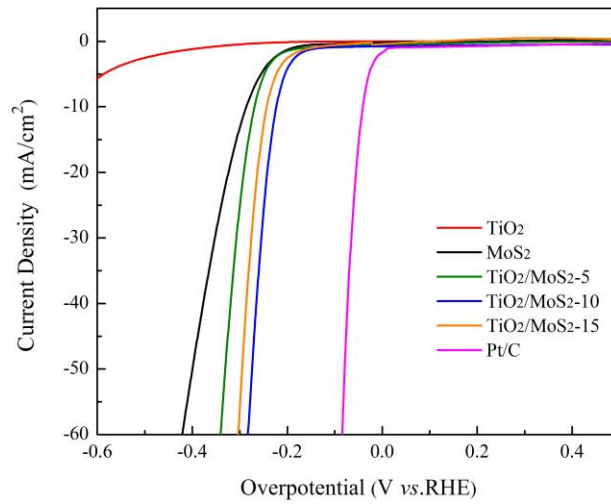

**Figure S4.** LSV polarization curves of different catalysts in 0.5 M  $\text{H}_2\text{SO}_4$  solution

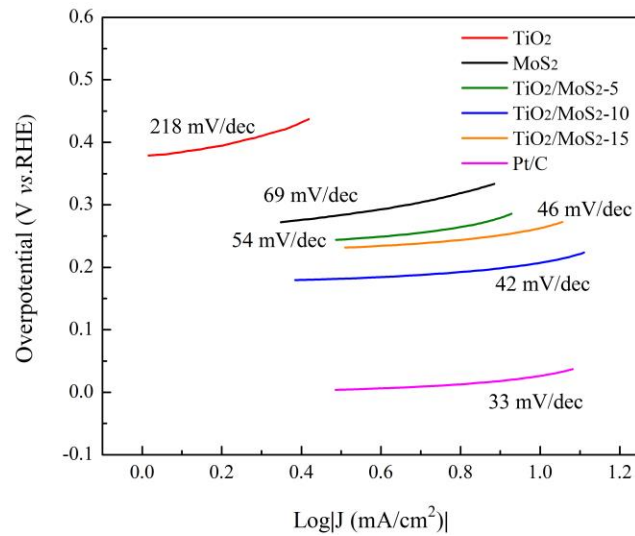

**Figure S5.** The Tafel curves of different catalysts in 0.5 M  $\text{H}_2\text{SO}_4$  solution

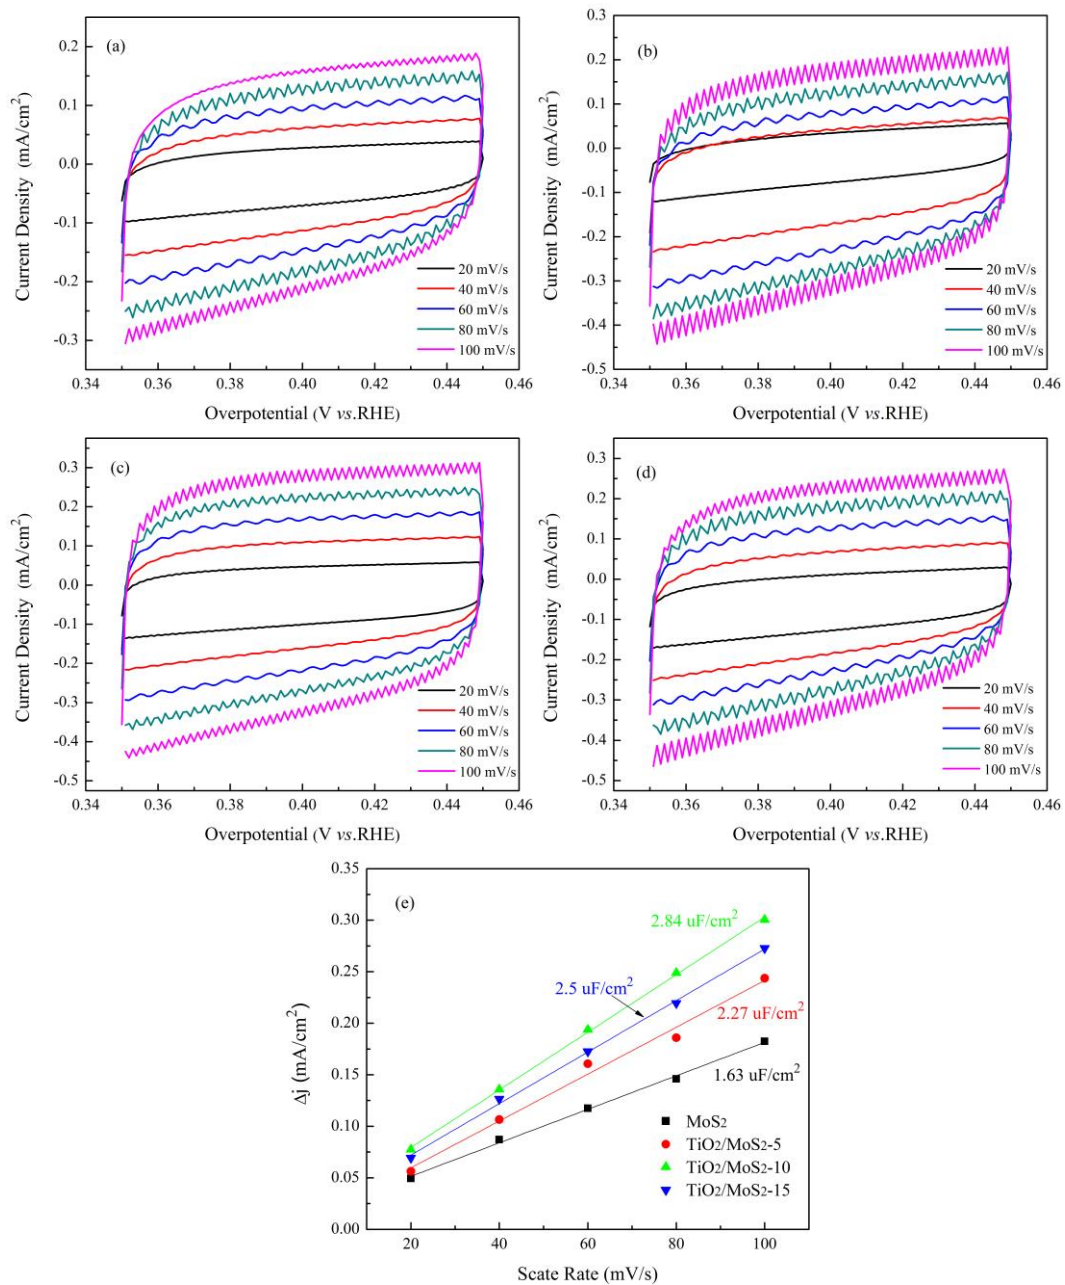

**Figure S6.** CV curves of (a) MoS<sub>2</sub> nanotube, (b) TiO<sub>2</sub>/MoS<sub>2</sub>, (c) TiO<sub>2</sub>/MoS<sub>2</sub>-5, (d) TiO<sub>2</sub>/MoS<sub>2</sub>-10 and (e) Linear fitting of the capacitive current densities versus scanning rates
